# Supplementary material
Source: PubMed Central journal article supplement (PMC3935768)
Supplement: NIHMS551259-supplement-Supplementary_Data.pdf [file NIHMS551259-supplement-Supplementary_Data.pdf]

## Supplementary Materials for

### **mTORC1 Inhibition Is Required for Sensitivity to PI3K p110 $\alpha$ Inhibitors in *PIK3CA*-Mutant Breast Cancer**

Moshe Elkabets, Sadhna Vora, Dejan Juric, Natasha Morse, Mari Mino-Kenudson, Taru Muranen, Jessica Tao, Ana Bosch Campos, Jordi Rodon, Yasir H. Ibrahim, Violeta Serra, Vanessa Rodrik-Outmezguine, Saswati Hazra, Sharat Singh, Phillip Kim, Cornelia Quadt, Manway Liu, Alan Huang, Neal Rosen, Jeffrey A. Engelman, Maurizio Scaltriti,\* José Baselga\*

\*Corresponding author. E-mail: scaltrim@mskcc.org (M.S.); baselgaj@mskcc.org (J.B.)

Published 31 July 2013, *Sci. Transl. Med.* **5**, 196ra99 (2013)

DOI: 10.1126/scitranslmed.3005747

#### **This PDF file includes:**

- Fig. S1. Cell viability after BYL719 treatment.
- Fig. S2. Inhibition of pS6(235/6) in sensitive and resistant cells.
- Fig. S3. Immunostaining of p4EBP1 in JIMT-1 and MCF7 xenografts treated with BYL719.
- Fig. S4. PI3K/Akt/mTOR pathway inhibition in drug-resistant cells treated with BYL719.
- Fig. S5. Scheme of the shRNA screen to identify candidate genes for resistance to PI3K inhibition.
- Fig. S6. Results of the shRNA resensitization screen.
- Fig. S7. Proliferation of drug-resistant cells treated with BYL719, RAD001, and the combination.
- Fig. S8. Apoptosis and PI3K/Akt/mTOR pathway inhibition in cells treated with BYL719, RAD001, or the combination.
- Fig. S9. 3D culture of drug-resistant cells treated with BYL719, RAD001, or the combination.
- Fig. S10. Biochemical and biological effects of BYL719, RAD001, or the combination on MCF7 parental and drug-resistant cells.
- Fig. S11. Scheme of the secreted protein screen.
- Fig. S12. Effects of IGF1 and NRG1 on BYL719-resistant cells.
- Table S1. List of 132 genes tested in the shRNA screen.
- Table S2. Antibody information.

#### **Other Supplementary Material for this manuscript includes the following:**

(available at [www.sciencetranslationalmedicine.org/cgi/content/full/5/196/196ra99/DC1](http://www.sciencetranslationalmedicine.org/cgi/content/full/5/196/196ra99/DC1))

Table S3. Original data (provided as a separate Excel file).

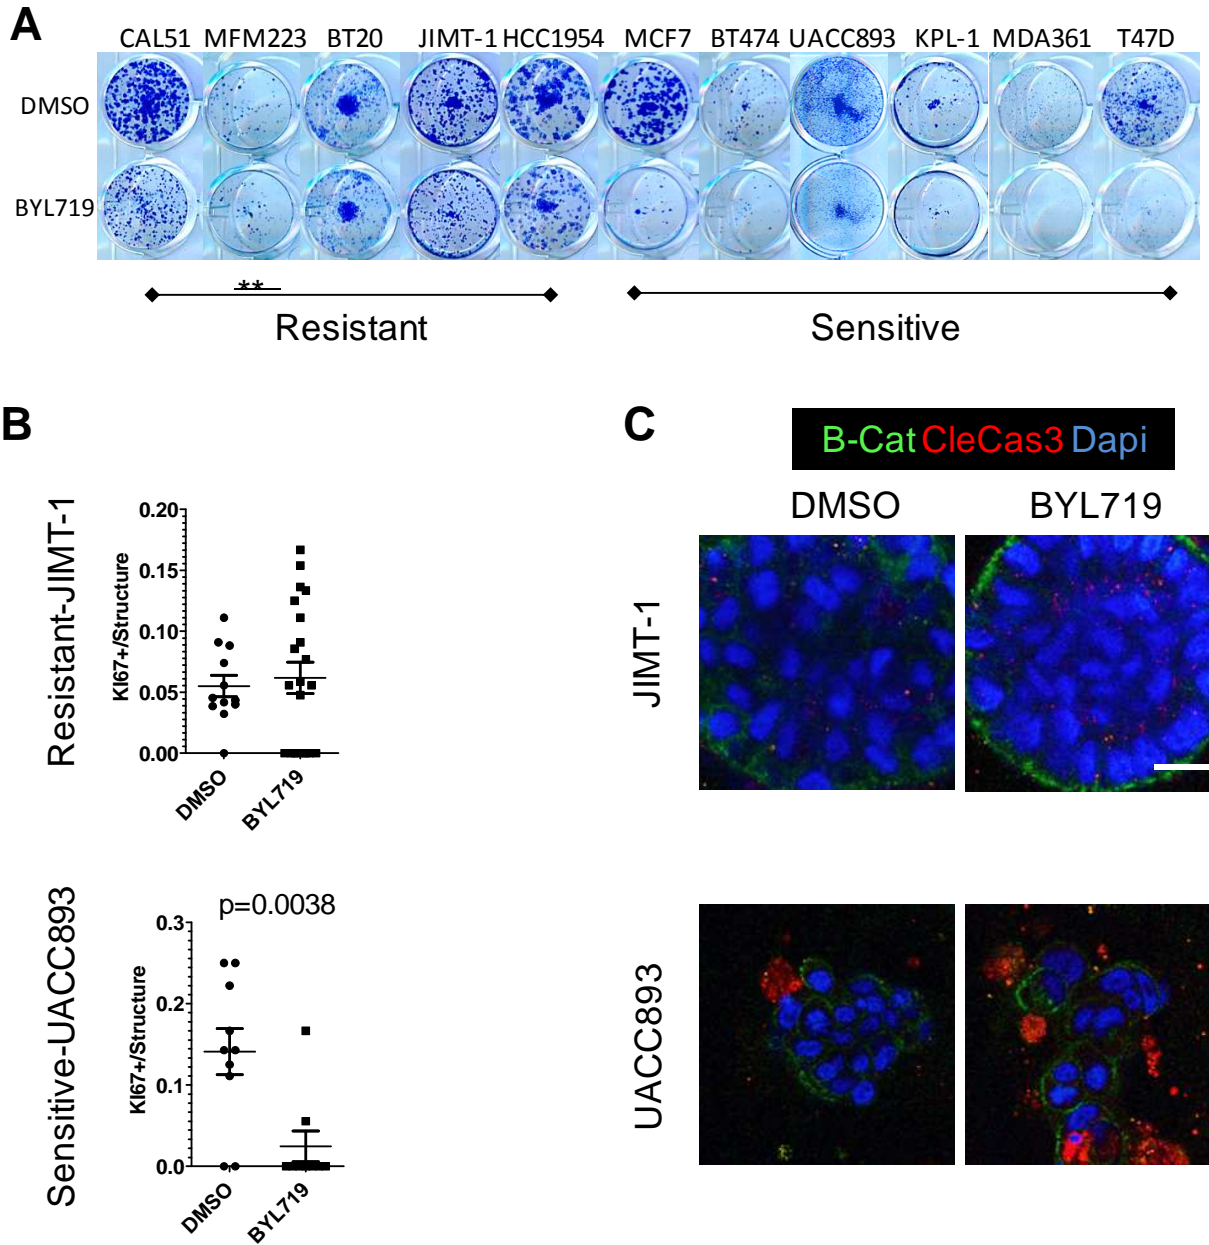

**Fig. S1: Cell viability after BYL719 treatment. (A)** Crystal Violet staining of breast cancer cells treated with 1  $\mu$ M BYL719 for 8-9 days. **(B)** Quantification of Ki67 staining per 3D structure of the BYL719 resistant JIMT-1 and the BYL719 sensitive UACC893 spheroids after 48 hours treatment with 1  $\mu$ M BYL719. **(C)** Representative cleaved caspase 3 (CleCas3, apoptosis, red), beta-catenin (B-cat, cell membranes, green), and nuclei (Dapi, blue) staining of the same spheroids after 48 hours of treatment with 1  $\mu$ M BYL719. scale bar = 10  $\mu$ m. Data are shown as mean  $\pm$  SEM. p-value was calculated using two-sided student's t-test.

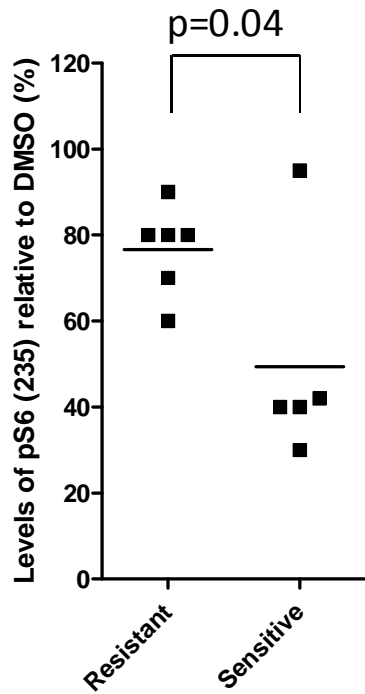

**Fig. S2: Inhibition of pS6(235/6) in sensitive and resistant cells.** Differences in pS6 (235/6) inhibition between BYL719 resistant and BYL719 sensitive cell lines (total of 11 PIK3CA-mut cell lines) were measured by quantitative immunofluorescence after 2 hours of BYL719 treatment. Mean values are indicated by horizontal bars. p-value was calculated using two-sided student's t-test.

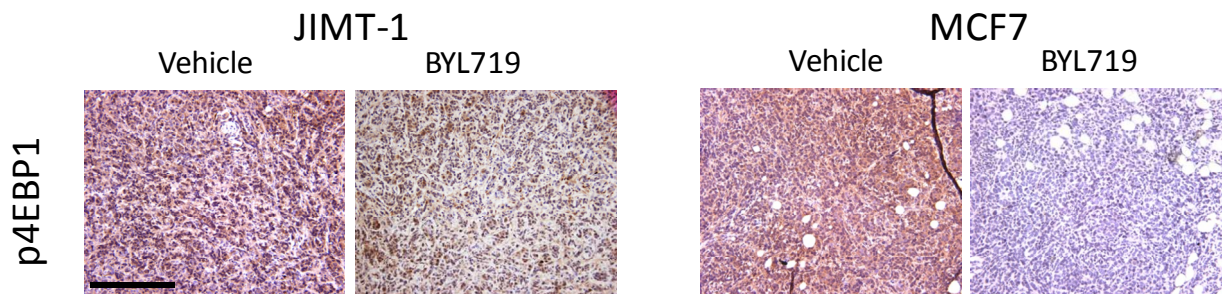

**Fig. S3: Immunostaining of p4EBP1 in JIMT-1 and MCF7 xenografts treated with BYL719.** IHC staining for p4EBP1 in JIMT-1 and MCF7 xenografts treated with vehicle or 50 mg/kg BYL719 daily. Images were captured at 20X magnification; scale bar = 200  $\mu$ m.



## shRNA re-sensitization

1) Generate pooled lentiviral shRNA library

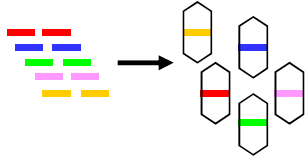

2) Infect target cells

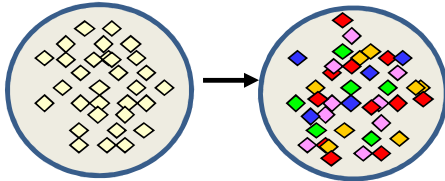

3) Culture cells +/- PI3Ki 7d

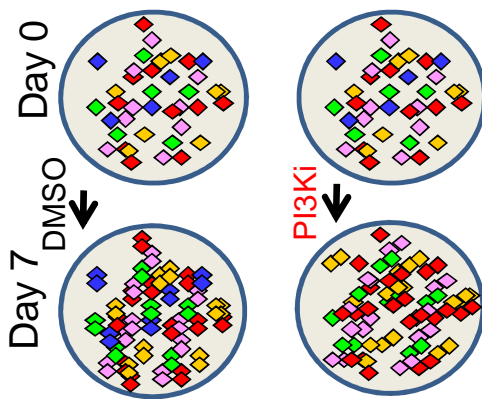

4) Isolate genomic DNA

5) Quantify shRNA by deep sequencing

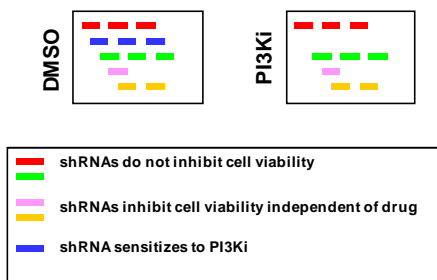

**Fig. S5: Scheme of the shRNA screen to identify candidate genes for resistance to PI3K inhibition.** Cells were infected with ~600 shRNA then selected by puromycin. Selected cells were re-cultured in the absence or presence of a PI3K inhibitor. After 7 days, genomic DNA was extracted and deep sequenced.

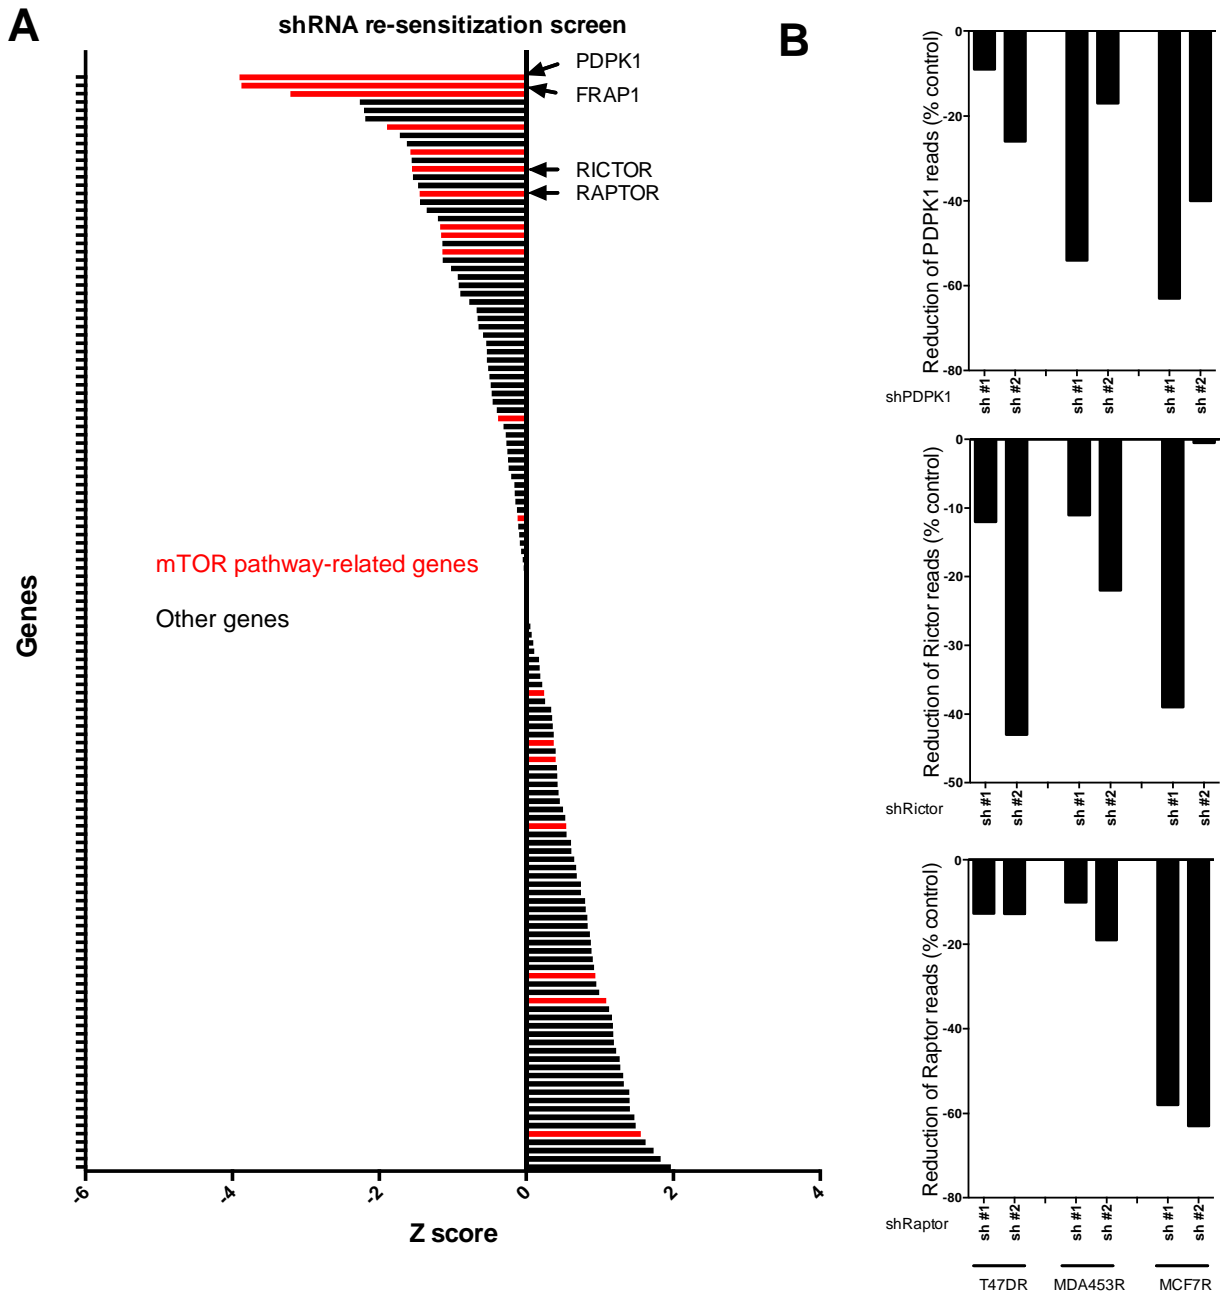

**Fig. S6: Results of the shRNA resensitization screen. (A)** For each gene, a score was calculated as described in Materials and Methods. 132 genes were ranked based on Z scores, which are presented here. Red bars indicate genes that are part of the mTOR pathway according to the KEGG PATHWAY Database. **(B)** Reduction in the number of reads by the individual PDPK1, Rictor, and Raptor shRNAs transfected into drug-resistant cells after 7 days of treatment with either BYL719 or GDC0941 (normalized to DMSO-treated controls).



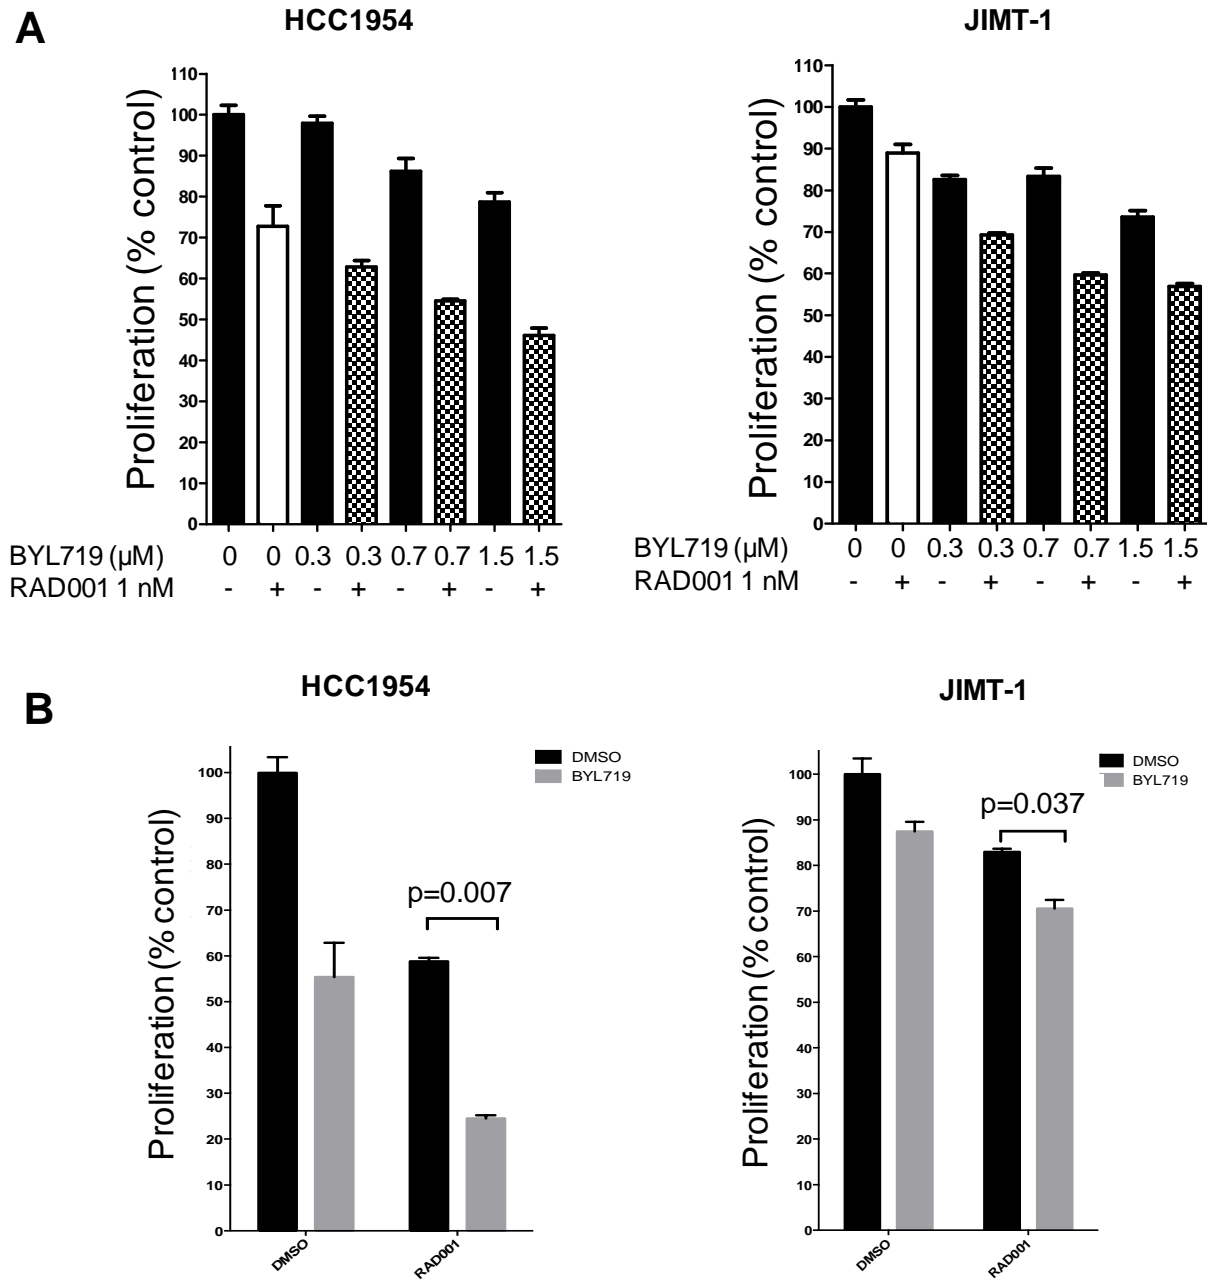

**Fig. S7: Proliferation of drug-resistant cells treated with BYL719, RAD001, and the combination. (A)** Proliferation assay (3 days) of HCC1954 and JIMT-1 treated with different concentrations of BYL719, with and without 1 nM RAD001. **(B)** Proliferation assay (5 days) of HCC1954 and JIMT-1 treated with different concentrations of RAD001, with and without 1 μM of BYL719. Data are shown as mean ± SEM. p-value was calculated using two-sided student's t-test.

# A Apoptosis

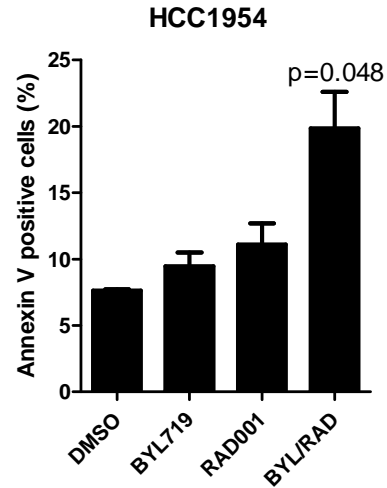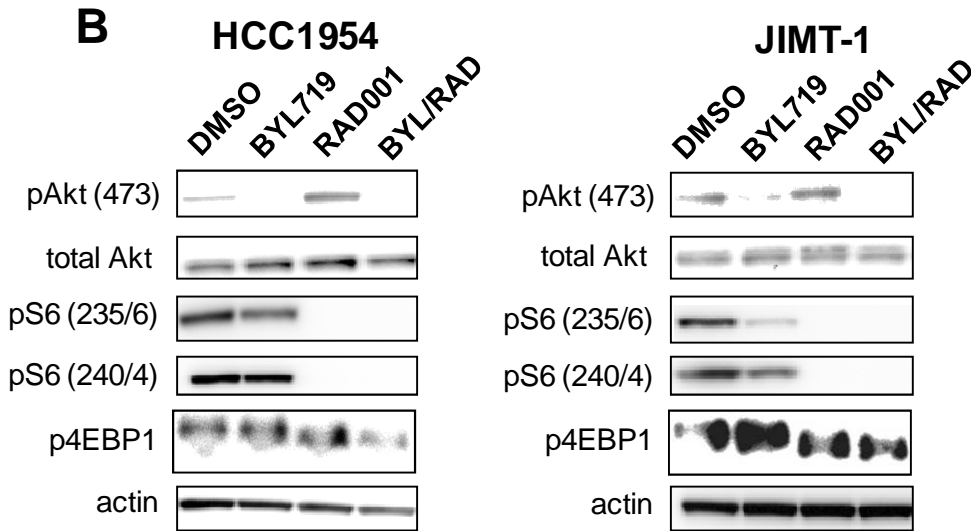

**Fig. S8: Apoptosis and PI3K/Akt/mTOR pathway inhibition in cells treated with BYL719, RAD001, or the combination. (A)** Annexin V analysis of HCC1954 cells after 72 hours of treatment with 0.5  $\mu$ M BYL719, 1 nM RAD001, or the combination of both compounds. **(B)** Protein lysates from HCC1954 and JIMT-1 cells treated for 18 hours with 0.5  $\mu$ M BYL719, 1 nM RAD001 or the combination were analyzed by immunoblotting against the indicated proteins. Data are shown as mean  $\pm$  SEM. p-value was calculated using two-sided student's t-test.

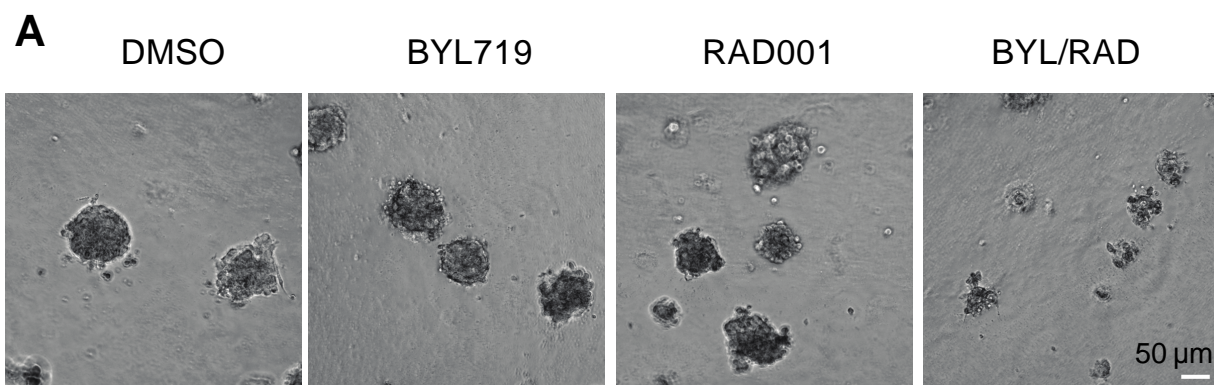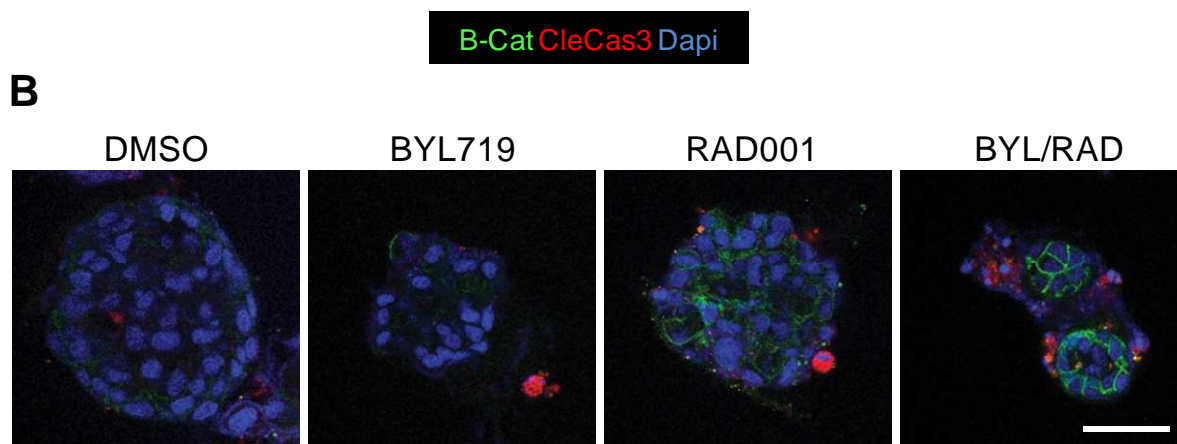

**Fig. S9: 3D culture of drug-resistant cells treated with BYL719, RAD001, or the combination.** (A) Phase contrast images of HCC1954 spheroids treated with BYL719, RAD001, or the combination for 48 hours. (B) Representative cleaved caspase 3 (CleCas3, apoptosis, red), beta-catenin (B-Cat, cell membranes, green), and nuclei (Dapi, blue) of HCC1945 spheroids after 48 hours of treatment with 1  $\mu$ M BYL719, 10 nM RAD001, or the combination of both compounds. Scale bar = 50  $\mu$ m.

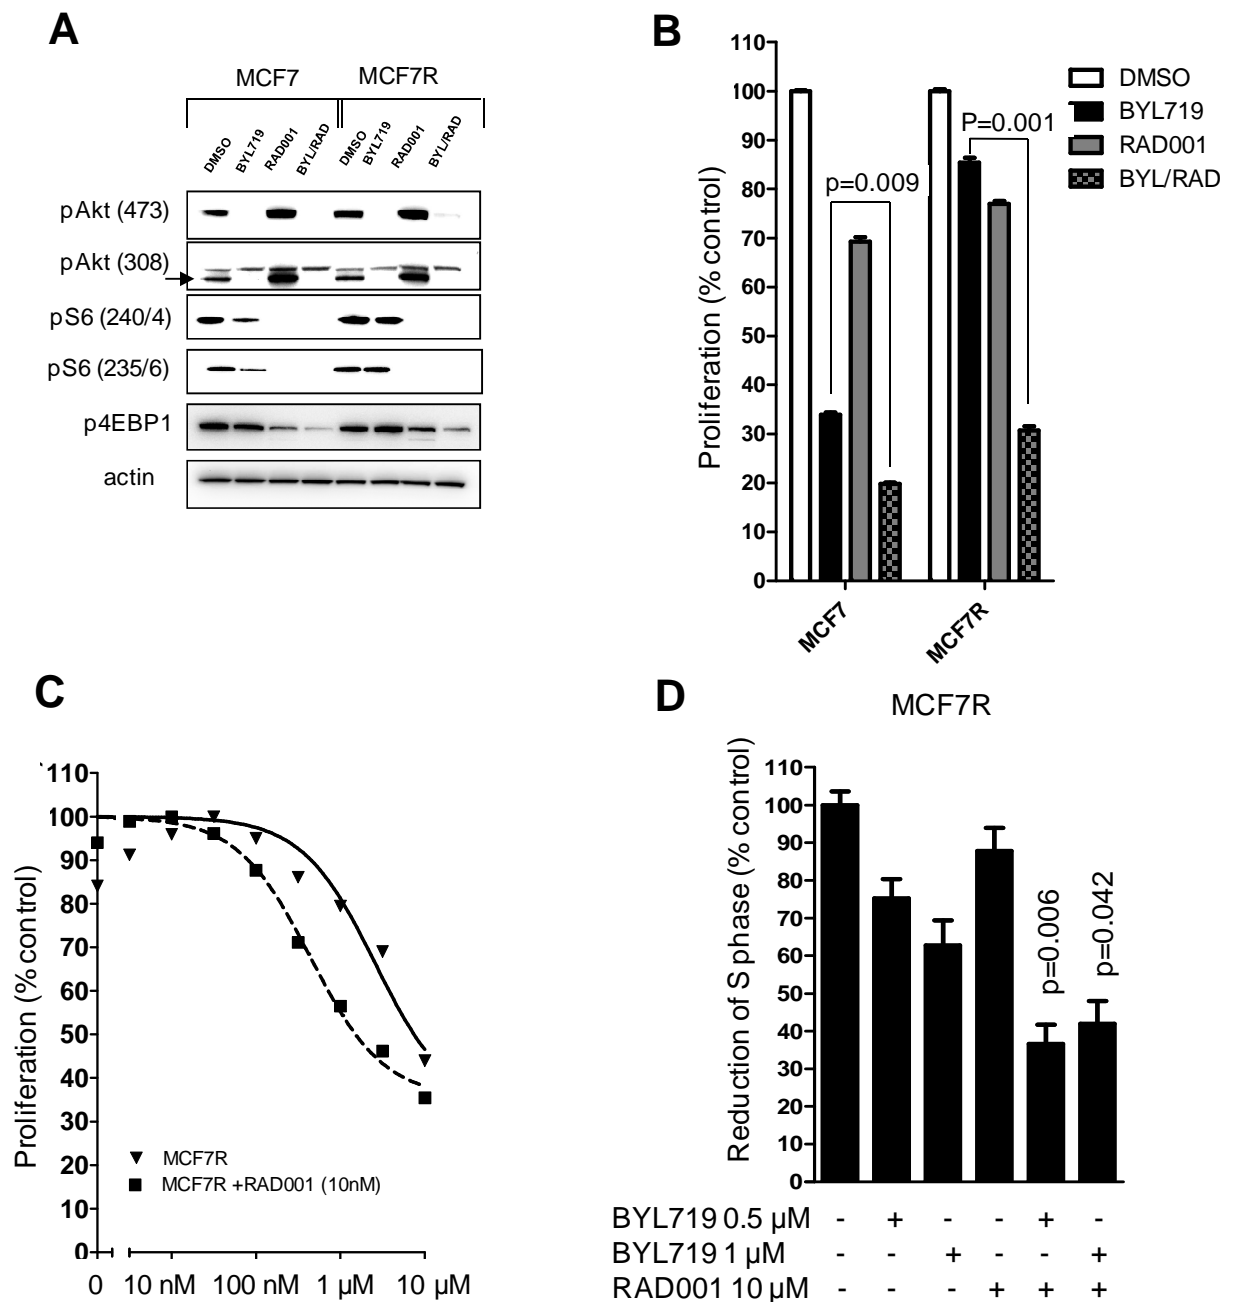

**Fig. S10: Biochemical and biological effects of BYL719, RAD001, or the combination on MCF7 parental and drug-resistant cells. (A)** Protein lysates from MCF7 and MCF7R cells treated 18 hours with BYL719, RAD001, or the combination were analyzed by immunoblotting against the indicated proteins. Arrow indicates specific bands. **(B)** Proliferation analysis of parental MCF7 and drug-resistant MCF7R after 5 days of treatment with 1 μM BYL719, 10 nM RAD001, or the combination of both compounds. **(C)** Dose-dependent inhibition of proliferation of MCF7R cells treated with BYL719 with or without 10 nM RAD001. **(D)** Cell cycle analysis of MCF7R cells treated as indicated for 48 hours. Data are shown as mean ± SEM. p-values were calculated using two-sided student's t-test.

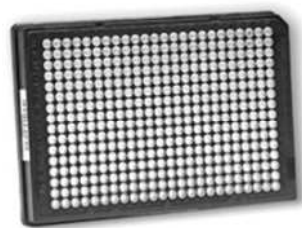

OTR Secretomics Library

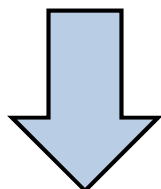

Transfer supernatant

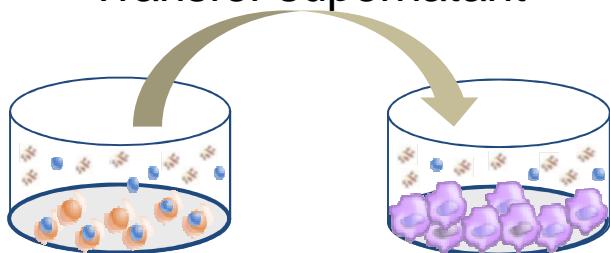

293T cells

MCF7/T47D cells  
+BYL719

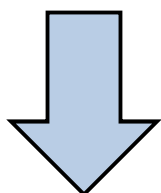

Relative tumor growth

**Fig. S11: Scheme of the secreted protein screen.** HEK293T cells were transfected with secreted protein library cDNAs and cultured for three days. Supernatants were then transferred to pre-seeded MCF7 and T47D cells that were treated with 1  $\mu$ M of BYL719 for an additional four days. The viability of MCF7 and T47D was measured by Titer-glo.

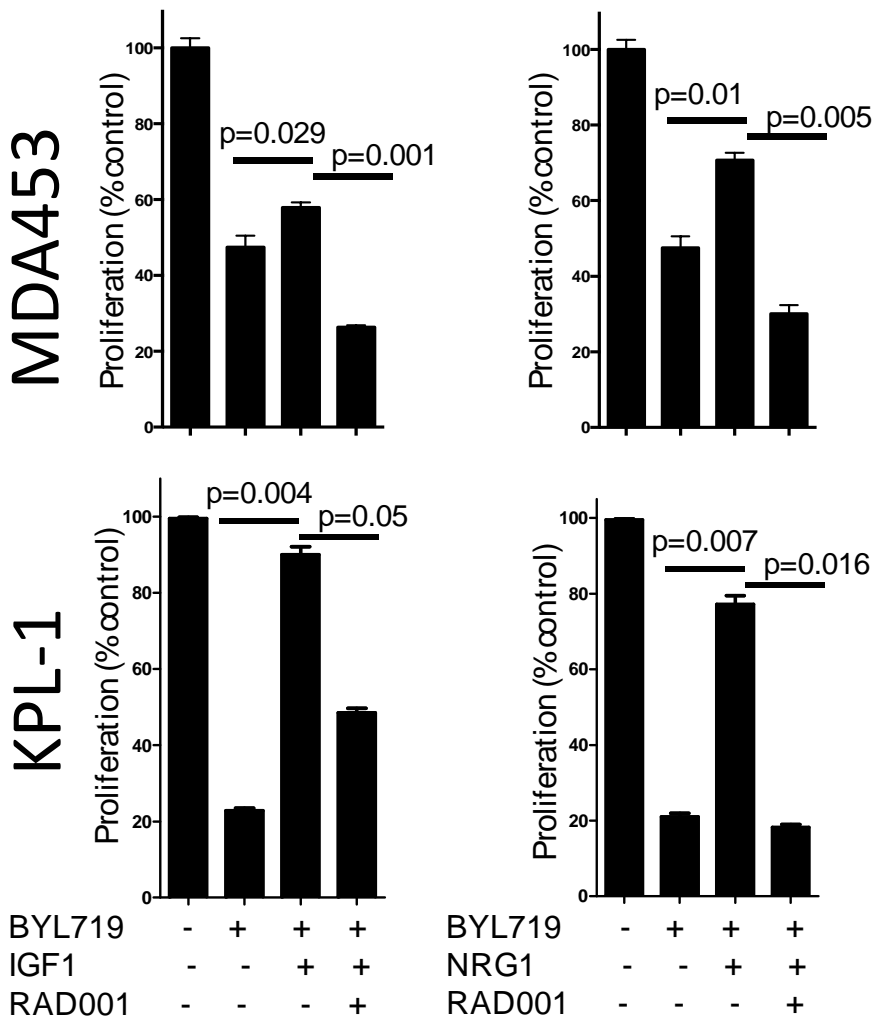

**Fig. S12: Effects of IGF1 and NRG1 on BYL719-resistant cells.** Proliferation of MDA453 and KPL-1 cells treated with 1  $\mu$ M BYL719, 1 nM RAD001, or the combination for 6 days, with or without recombinant IGF1 and NRG1. Data are shown as means  $\pm$  SEM. p-value was calculated using two-sided student's t-test.

|        |          |        |        |        |
|--------|----------|--------|--------|--------|
| ABL1   | EGFR     | IRAK1  | PIK3CB | SGK2   |
| ABL2   | EPHB4    | IRAK4  | PIK3CD | SGK3   |
| Akt1   | ERBB2    | JAK2   | PIK3CG | SMG1   |
| Akt2   | ERBB3    | KDR    | PIK3R5 | SMO    |
| Akt3   | FDPS     | KIF11  | PIK4CA | SRC    |
| ALK    | FGFR1    | KIT    | PIM1   | SYK    |
| ARAF   | FGFR2    | KRAS   | PIM2   | TEK    |
| ATM    | FGFR3    | LCK    | PIM3   | TGFBR1 |
| ATR    | FGFR4    | MAP2K1 | PLK4   | TNKS   |
| AURKA  | FLT3     | MAP2K2 | POLB   | TOP1   |
| AURKB  | FRAP1    | MAP3K8 | PRKCA  | TOP2A  |
| AURKC  | GOLPH3   | MAPK1  | PRKCB1 | TPMT   |
| BACE1  | HDAC1    | MAPK14 | PRKCD  |        |
| BCL2   | HDAC10   | MAPK3  | PRKCE  |        |
| BCL2L1 | HDAC11   | MAPK8  | PRKCG  |        |
| BIRC2  | HDAC2    | MCL1   | PRKCH  |        |
| BIRC3  | HDAC3    | MDM2   | PRKCI  |        |
| BIRC4  | HDAC4    | MELK   | PRKCQ  |        |
| BMX    | HDAC5    | MET    | PRKCZ  |        |
| BRAF   | HDAC6    | NRAS   | PRLR   |        |
| CCRK   | HDAC7A   | NTRK1  | PTPN6  |        |
| CDK4   | HDAC8    | NTRK2  | RAF1   |        |
| CDK6   | HDAC9    | PAK1   | RB1    |        |
| CDK9   | HIF1A    | PAK2   | RET    |        |
| CSF1R  | HRAS     | PARP1  | RICTOR |        |
| CTNNB1 | HSP90AA1 | PDGFRA | ROCK1  |        |
| DDIT4  | HSP90AB1 | PDGFRB | ROCK2  |        |
| DDR1   | IGF1R    | PDPK1  | RPTOR  |        |
| DGAT1  | IKBKB    | PI4K2B | SCD    |        |
| DHFR   | ILK      | PIK3CA | SGK    |        |

**Table S1:** List of 132 genes tested in the shRNA screen.

| Antibody              | Company        | Catalog number       | Dilution     | Assay   |
|-----------------------|----------------|----------------------|--------------|---------|
| pAKT (473)            | Cell Signaling | 4060                 | 1:100,1:50   | WB, IHC |
| pAKT (308)            | Cell Signaling | 9275                 | 1:100        | WB      |
| AKT                   | Cell Signaling | 9272S                | 1:1000       | WB      |
| pS6 (240/4)           | Cell Signaling | 5364                 | 1:4000,1:400 | WB, IHC |
| pS6 (235/6)           | Cell Signaling | 4857                 | 1:4000,1:75  | WB, IHC |
| S6                    | Cell Signaling | 2217L                | 1:1000       | WB      |
| p4EBP1(T37/46)        | Cell Signaling | 2855L                | 1:500,1:1500 | WB, IHC |
| phospho-PRAS40 (T246) | Cell Signaling | 2997S                | 1:500        | WB      |
| Cleaved caspase-3     | Cell Signaling | 9664                 | 1:200        | IF      |
| Beta-Catenin          | BD             | 610153               | 1:200        | IF      |
| KI67                  | Novocastra     | NCL-Ki67-P           | 1:200        | IF      |
| 4EBP1                 | Cell Signaling | 9644S                | 1:1000       | WB      |
| eIF4E                 | Cell Signaling | <a href="#">9742</a> | 1:1000       | WB      |
| Beta-Actin            | Sigma-Aldrich  | A2228                | 1:10000      | WB      |
| Alexa-568             | Invitrogen     | A11061               | 1:400        | IF      |
| Alexa-488             | Invitrogen     | A12379               | 1:400        | IF      |

**Table S2:** Antibody information. WB, western blot; IHC, immunohistochemistry; IF, immunofluorescence.
